# Supplementary figures and images for: Efflux Might Participate in Decreased Susceptibility to Oxytetracycline in Contagious Agalactia-Causative Mycoplasma spp
Source: MDPI journal article supplement (doi:10.3390/ani11082449), 2021-08-20

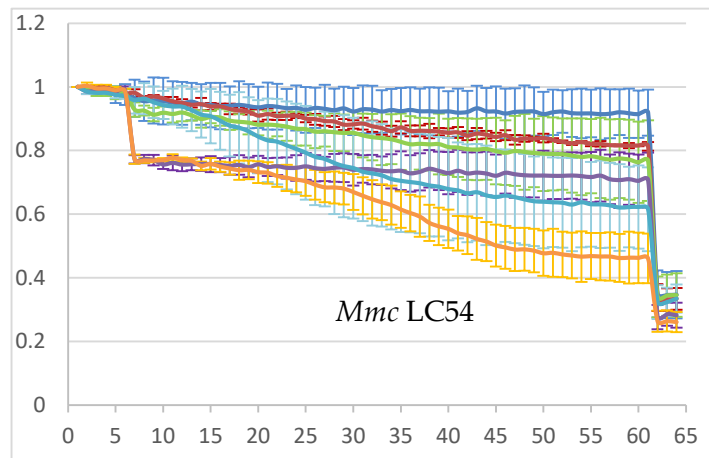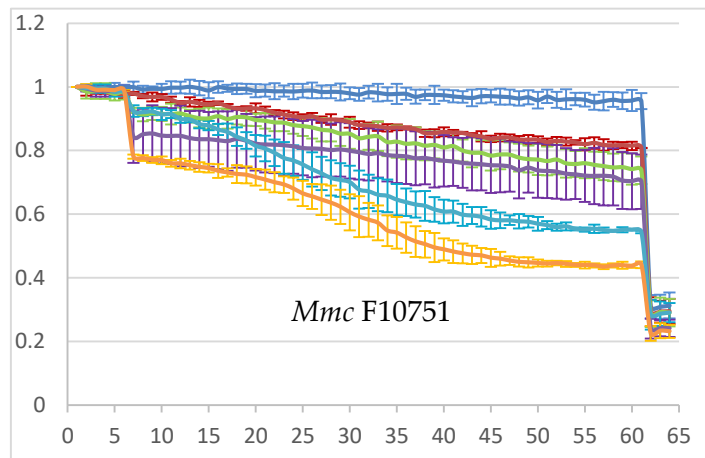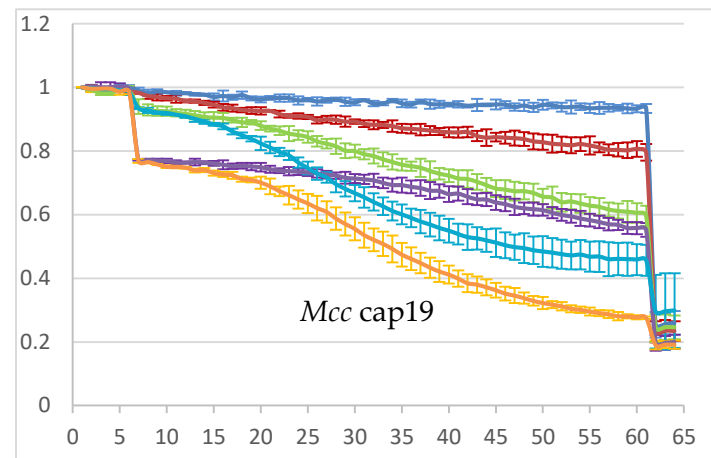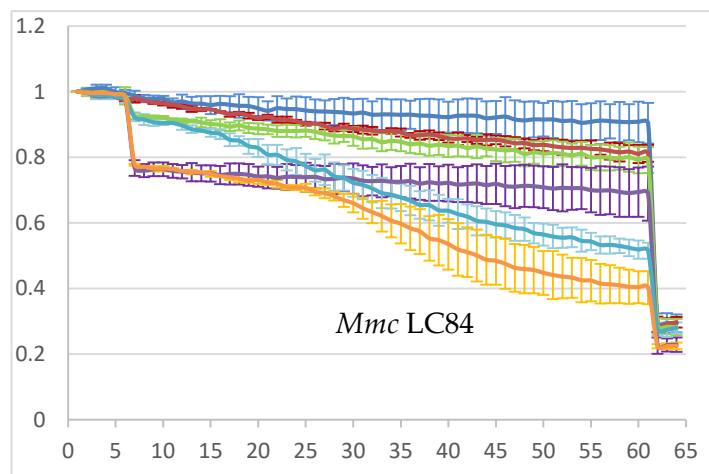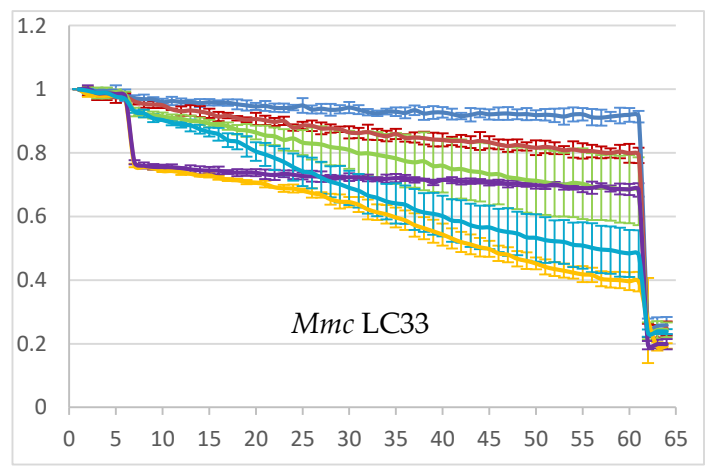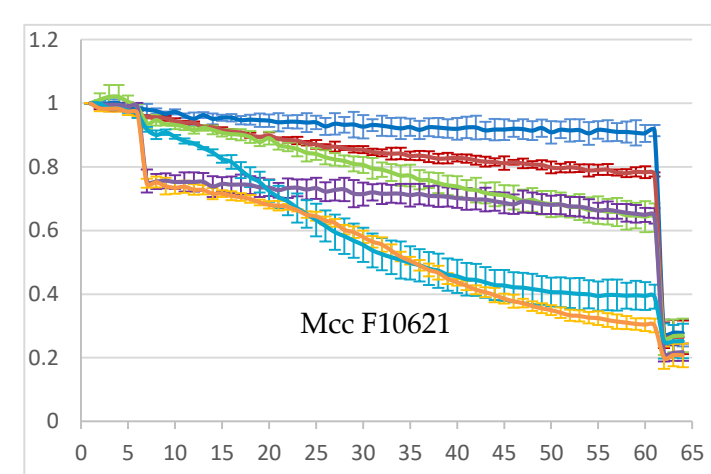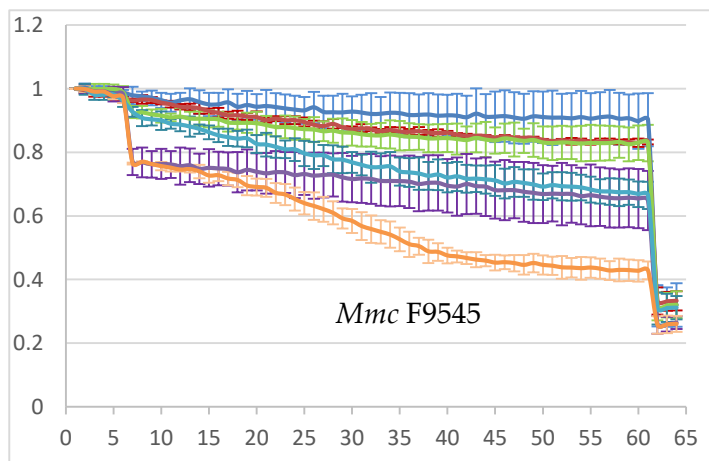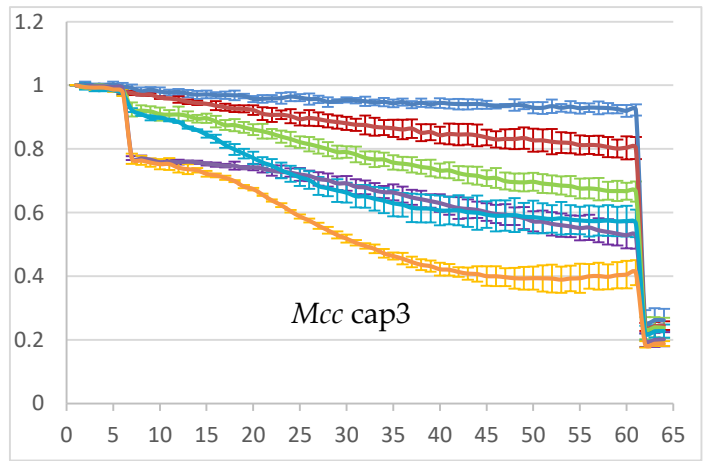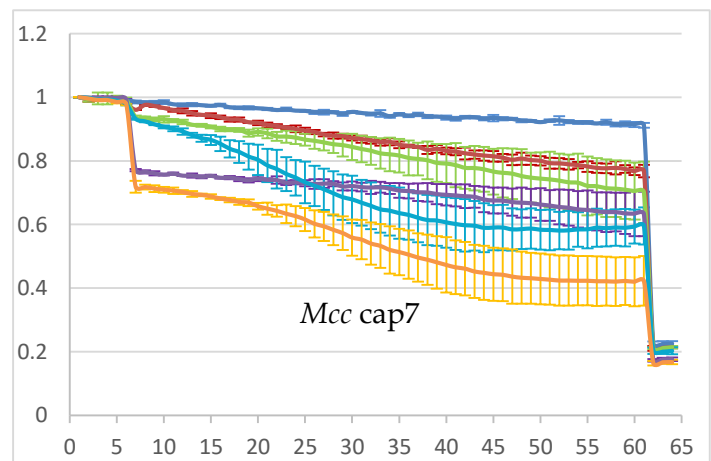

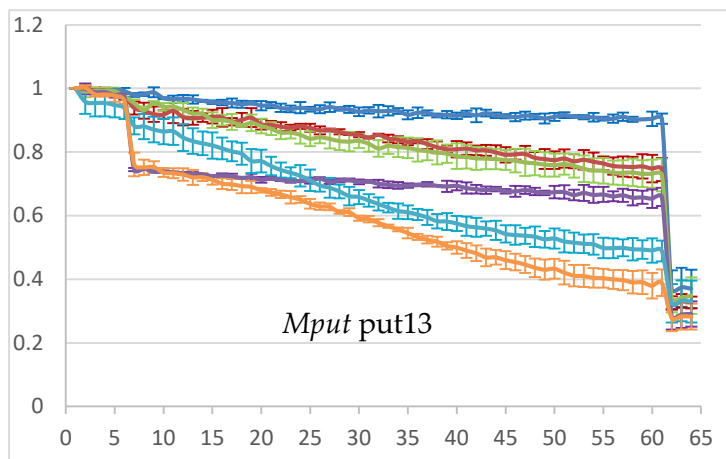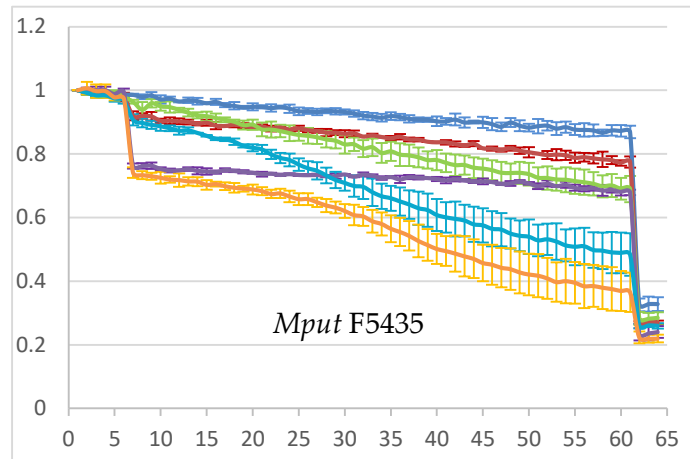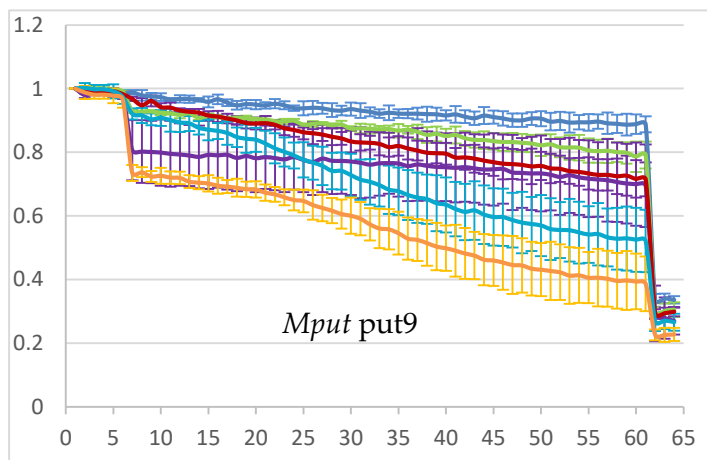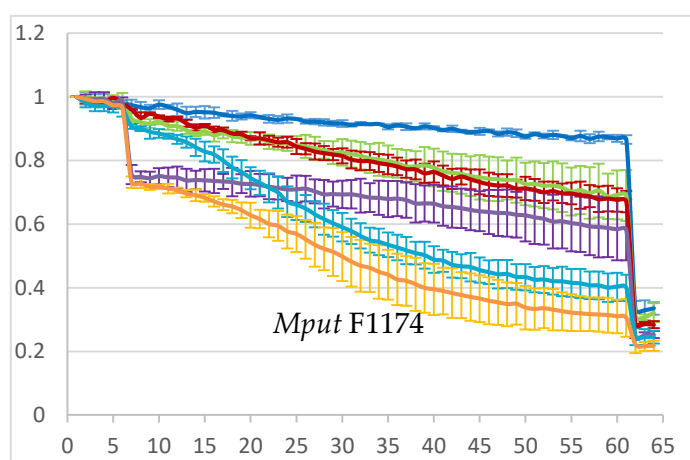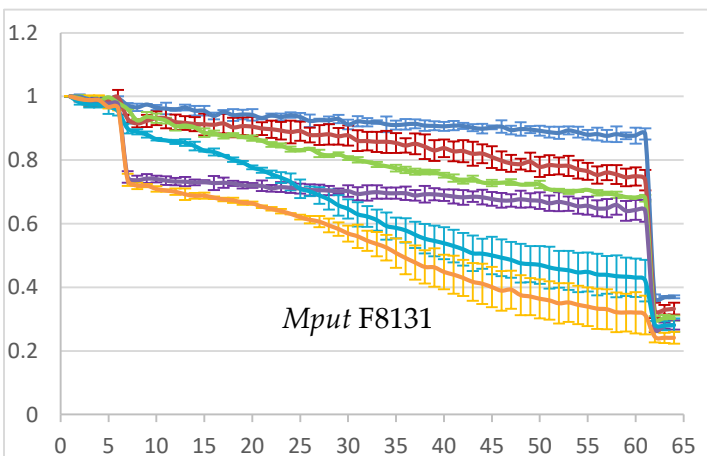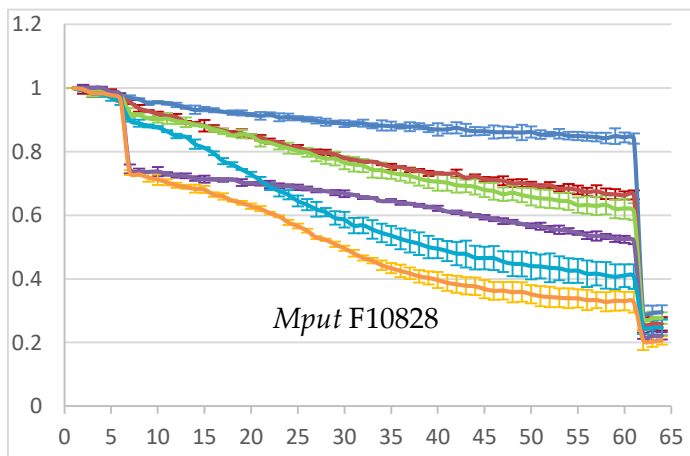

- PBS only at 25°C
- PBS only at 37°C
- + Pyruvate at 25°C
- + Pyruvate at 37°C
- + Glucose at 25°C
- + Glucose at 37°C

Supplement: s1 [file s1]

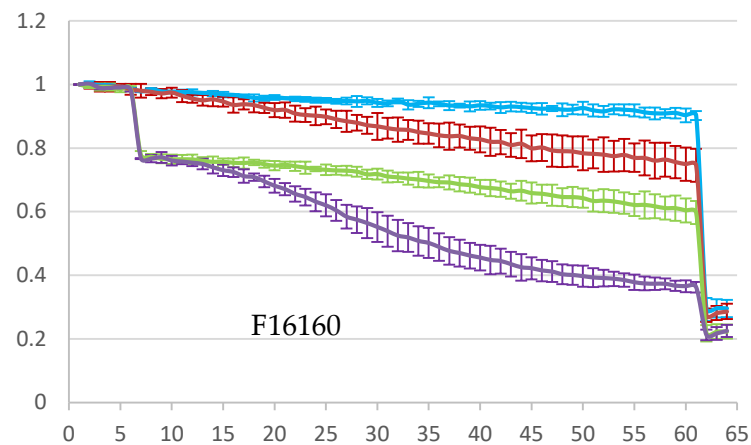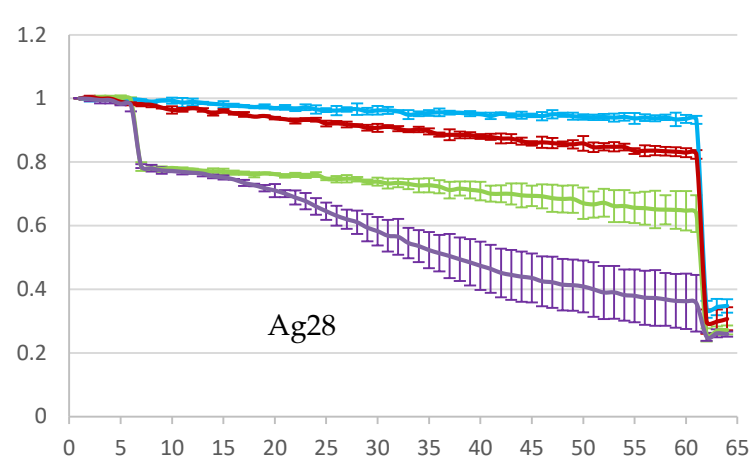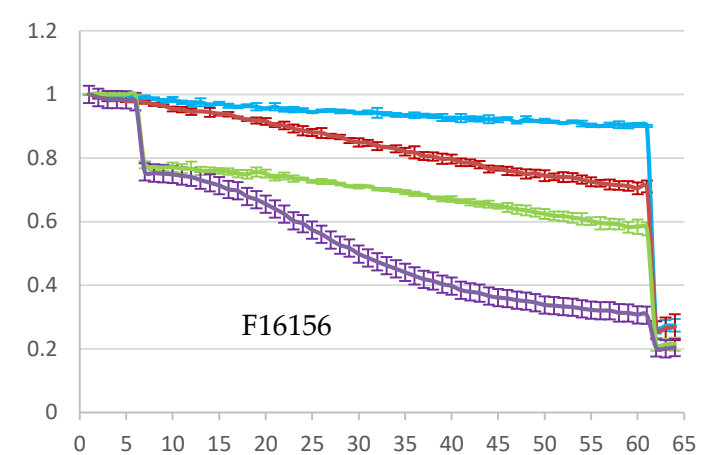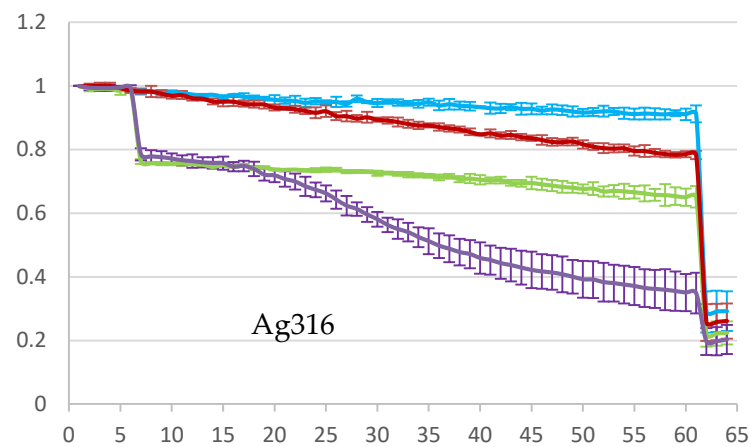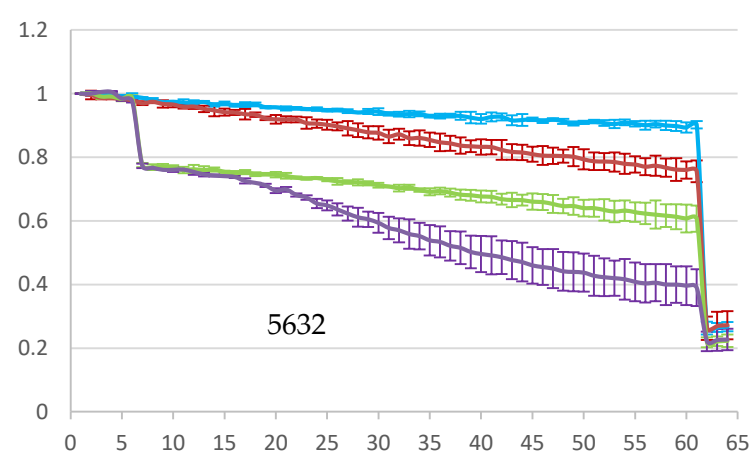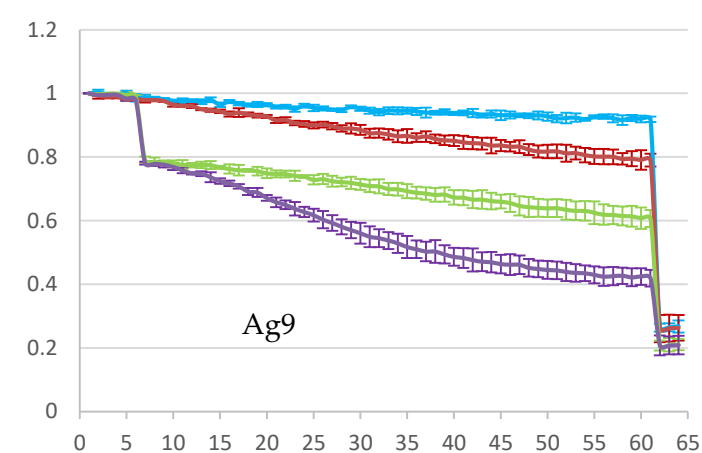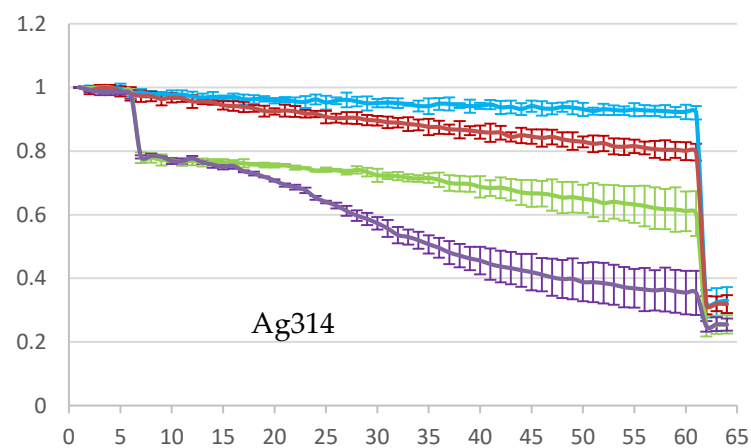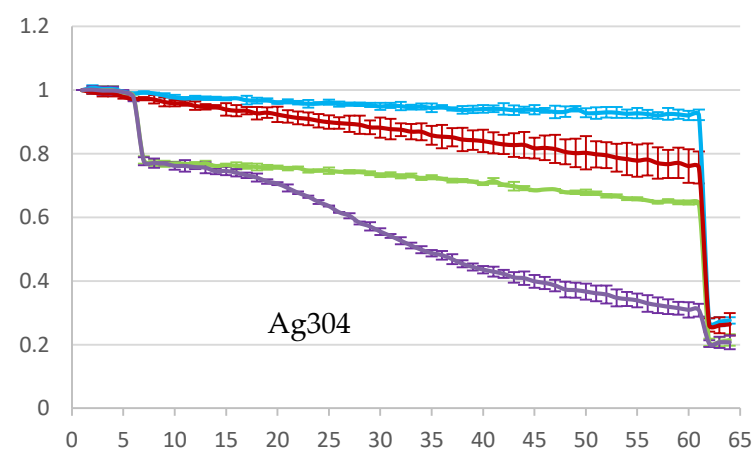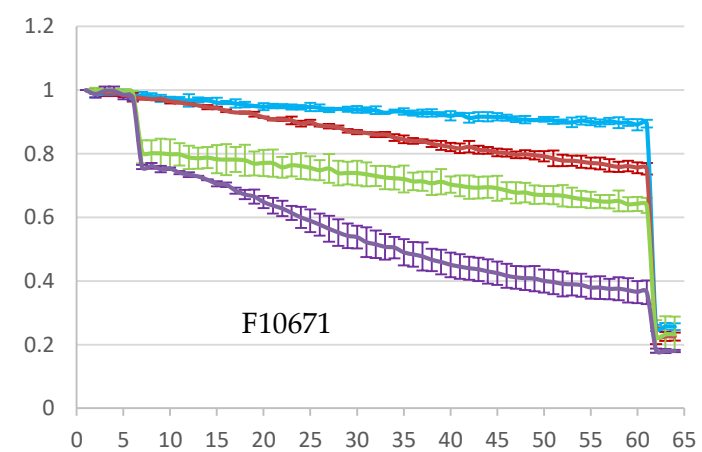

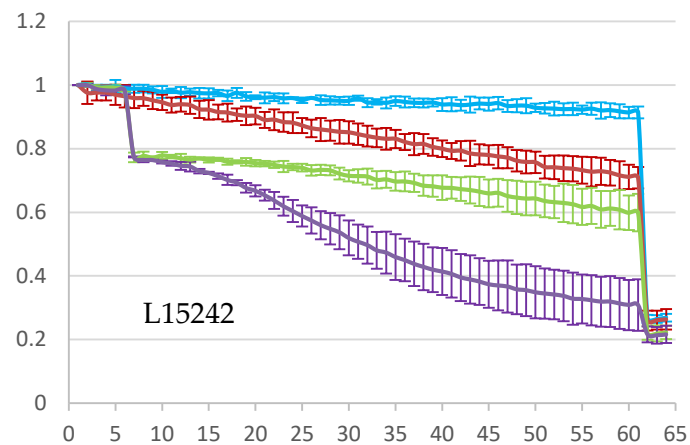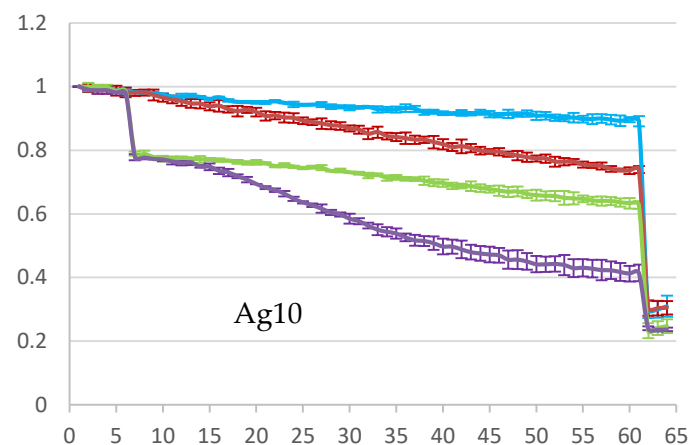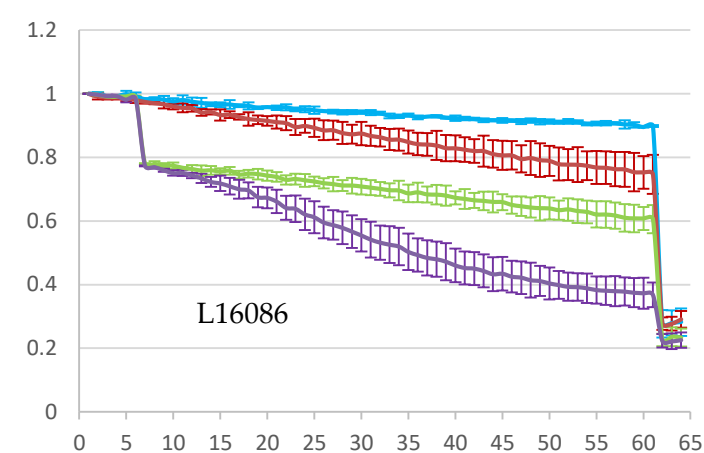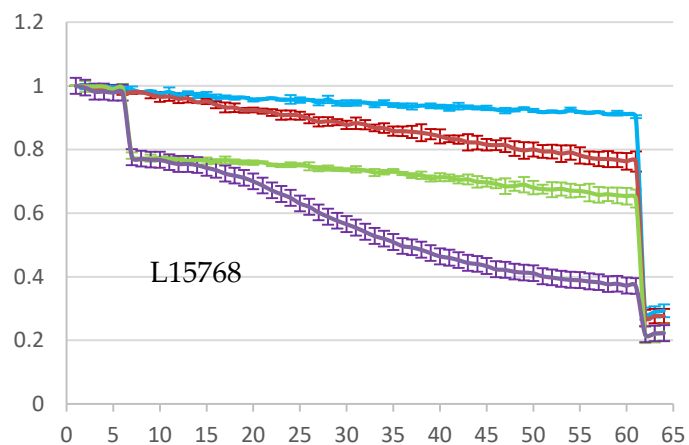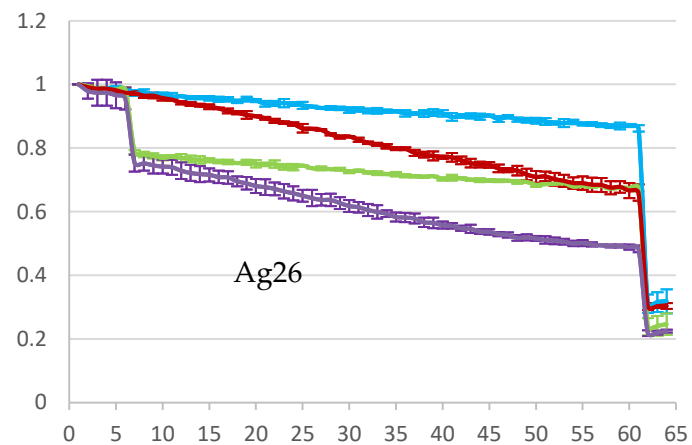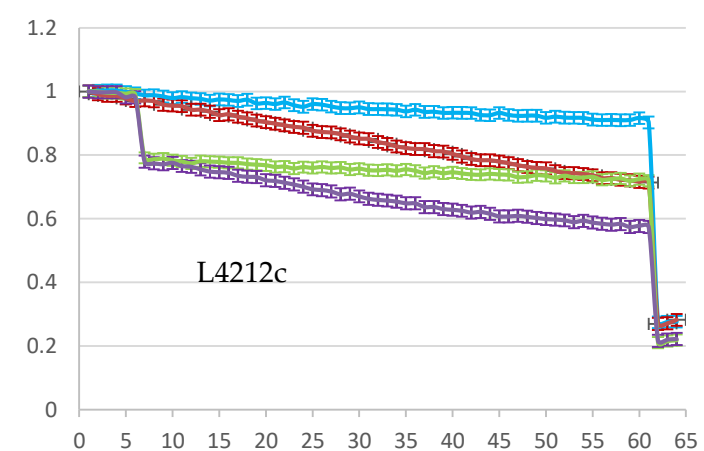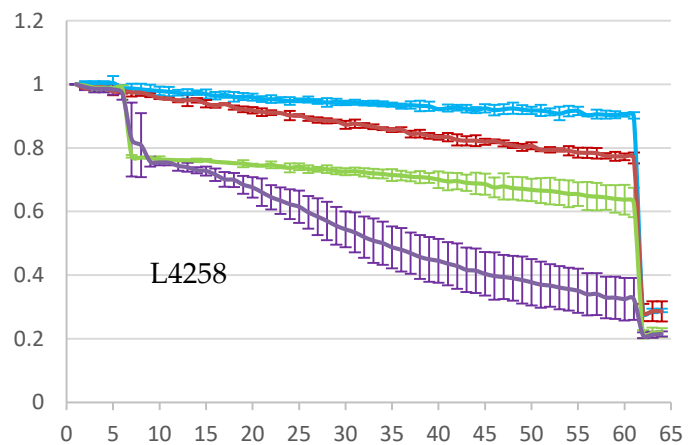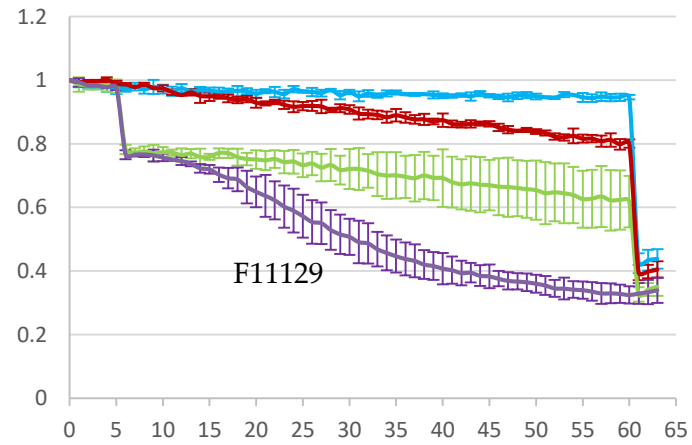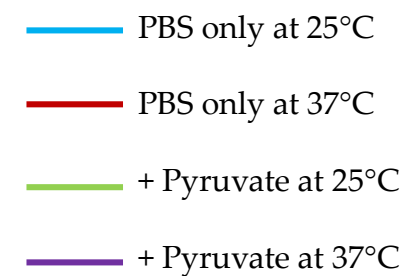

Supplement: s1 [file s1]
